# Supplementary material for: Copper intrauterine device use and HIV acquisition in women: a systematic review
Source: PubMed Central journal article supplement — BMJ Sex Reprod Health. 2020 Jan 9;46(1):17–25. doi: 10.1136/bmjsrh-2019-200512 (PMC6978563; doi:10.1136/bmjsrh-2019-200512), 2020-01-09
Supplement: bmjsrh-2019-200512supp001.pdf [file bmjsrh-2019-200512supp001.pdf]

**Appendix 1. Search strategy, run on 26<sup>th</sup> June 2019**

| <b>Database</b>             | <b>Strategy</b>                                                                                                                                                                                                                         |
|-----------------------------|-----------------------------------------------------------------------------------------------------------------------------------------------------------------------------------------------------------------------------------------|
| <b>Medline (OVID) 1946-</b> | Contraception/mt OR contraception/ae OR contraceptive device* OR intrauterine device* OR intra-uterine device* OR IUD* OR IUCD*<br>AND<br>HIV* OR human immunodeficiency virus* OR AIDS OR acquired immunodeficiency syndrome           |
| <b>Embase (OVID) 1947-</b>  | contraception/ae OR contraceptive device* OR intrauterine device* OR intra-uterine device* OR IUD* OR IUCD*<br>AND<br>HIV* OR human immunodeficiency virus* OR AIDS OR acquired immunodeficiency syndrome<br>NOT<br>pubmed/medline      |
| <b>Cochrane Library</b>     | [mh "Contraceptive devices"] OR ("contraceptive device*" OR "intrauterine device*" OR "intra-uterine device*" OR IUD* OR IUCD*);ti,ab<br>AND<br>HIV* OR "human immunodeficiency virus*" OR AIDS OR "acquired immunodeficiency syndrome" |
